# Supplementary material for: Hemodynamic provocation with acetazolamide shows impaired cerebrovascular reserve in adults with sickle cell disease
Source: PubMed Central journal article supplement — Haematologica. 2018 Dec 6;104(4):690–9. doi: 10.3324/haematol.2018.206094 (PMC6442969; doi:10.3324/haematol.2018.206094), 2019-04
Supplement: 2018_206094-Disclosures_and_Contributions.pdf [file 2018_206094-Disclosures_and_Contributions.pdf]

Haematologica  
HAEMATOL/2018/206094  
Version 3

Hemodynamic provocation with acetazolamide shows impaired  
cerebrovascular reserve in adults with sickle cell disease

Lena Václav, Benoit N Meynart, Henk JMM Mutsaerts, Esben Thade  
Petersen, Charles BLM Majoie, Ed T. VanBavel, John C Wood, Aart J  
Nederveen, and Bart J Biemond

Disclosures: none

Contributions: L.V. designed the research, performed the research, collected the data, analyzed and interpreted the data and wrote the manuscript; B.N.M. analyzed data; H.J.M.M. designed the research and provided analysis tools; E.T.P. designed the research and provided MRI sequences and analysis tools; C.B.L.M. performed radiological evaluation of MR data; E.T.vB interpreted the data and wrote the manuscript; J.C.W. interpreted the data and wrote the manuscript; A.J.N. designed the research, analyzed and interpreted the data and wrote the manuscript; B.J.B. designed the research, performed the research, collected the data, analyzed and interpreted the data and wrote the manuscript. All authors critically reviewed and approved the final version of the manuscript.
